# Supplementary material for: Occurrence of Total and Proteinase K-Resistant Alpha-Synuclein in Glioblastoma Cells Depends on mTOR Activity
Source: MDPI journal article supplement (doi:10.3390/cancers14061382), 2022-03-08
Supplement: s1 [file s1]

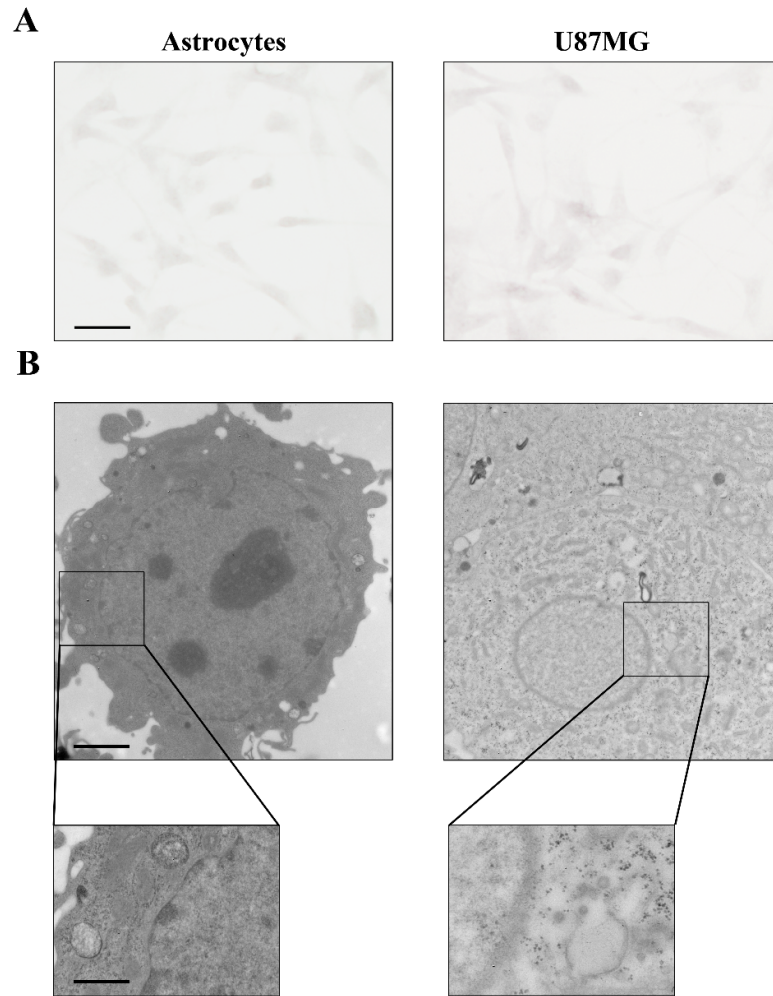

**Figure S1.** Negative control of the  $\alpha$ -syn immunocytochemistry procedure. Representative pictures from astrocytes and U87MG cells at light (**A**) and transmission electron microscopy (**B**) were obtained by omitting the anti- $\alpha$ -syn primary antibody. All pictures show the absence of immunoreaction. (**A**) Scale bar=35  $\mu$ m, (**B**) Scale bar = 0.6  $\mu$ m (low magnification); Scale bar = 0.15  $\mu$ m.

**A**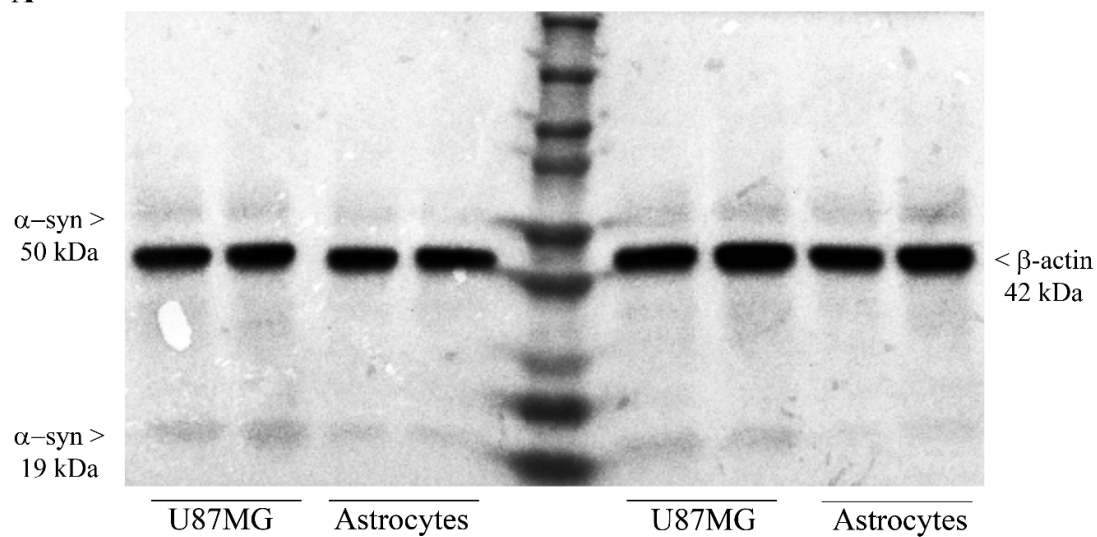**B**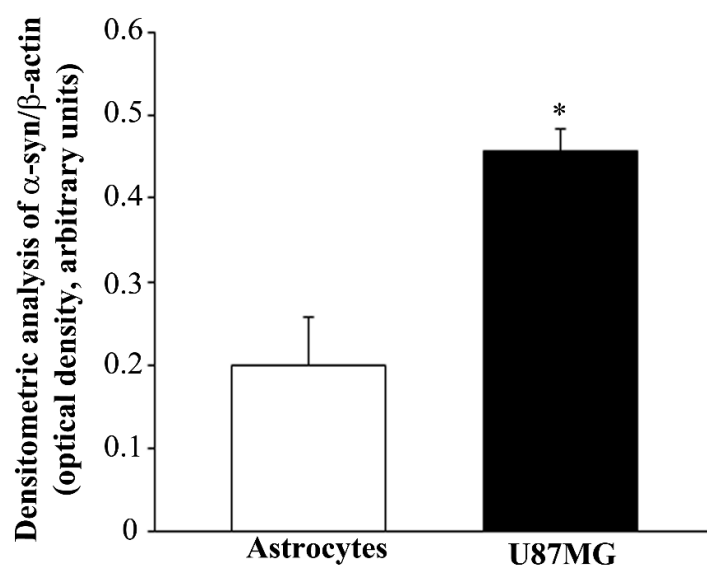

**Figure S2.** Immuno-blotting for a-syn in astrocytes and U87MG cells in baseline condition. **(A)** Representative immuno-blotting for  $\alpha\text{-syn}$  and the housekeeping  $\beta\text{-actin}$  is shown. **(B)** The graph reports the related optical density. Values are given as the mean  $\pm$  S.E.M. of  $n = 3$  blots obtained in  $N=1$  experiment. \*  $p < 0.05$  compared with astrocytes. .

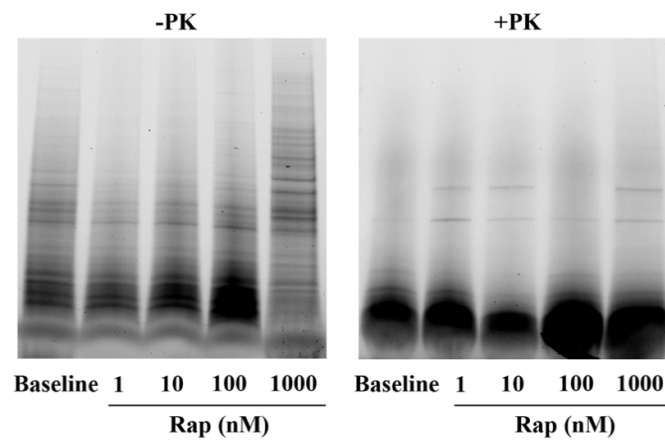

**Figure S3.** Stain free gel following PK. Representative images showing the pattern of protein bands visualized by using a stain-free gel enabled Bio-Rad UV transilluminator (ChemiDoc) without exposure to the denaturing agent (-PK) and following exposure to PK (+PK).

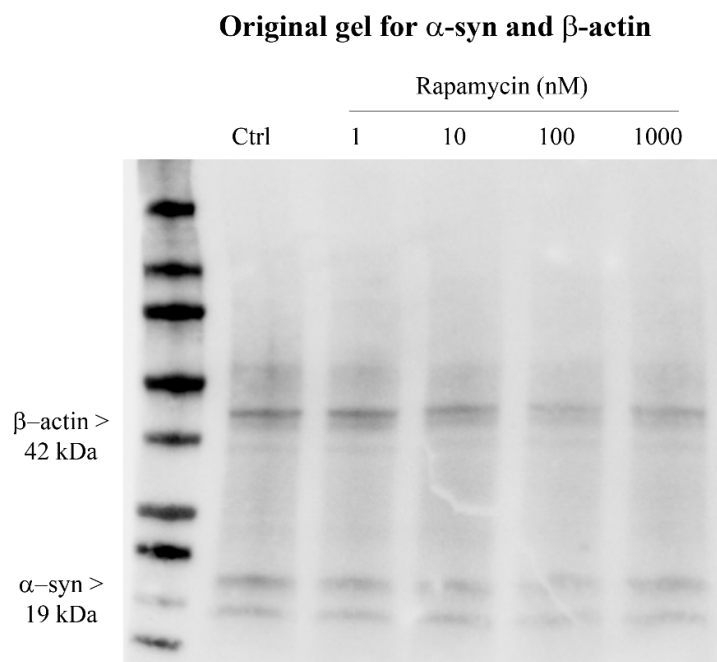

**Figure S4.** Original gel for  $\alpha$ -syn and the housekeeping protein  $\beta$ -actin shown in Figure 8.

**Original gel for PK-resistant  $\alpha$ -syn**

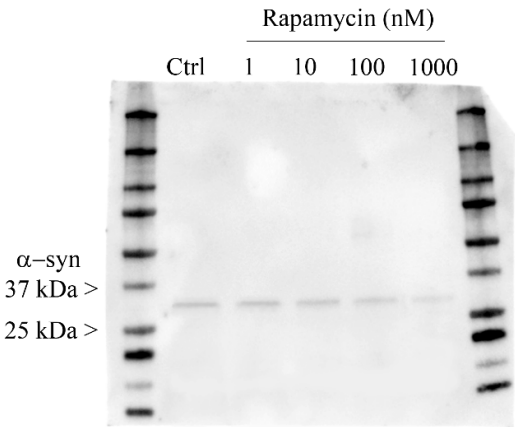

**Figure S5.** Original gel for  $\alpha$ -syn and the housekeeping protein  $\alpha$ -actin shown in Figure 9.

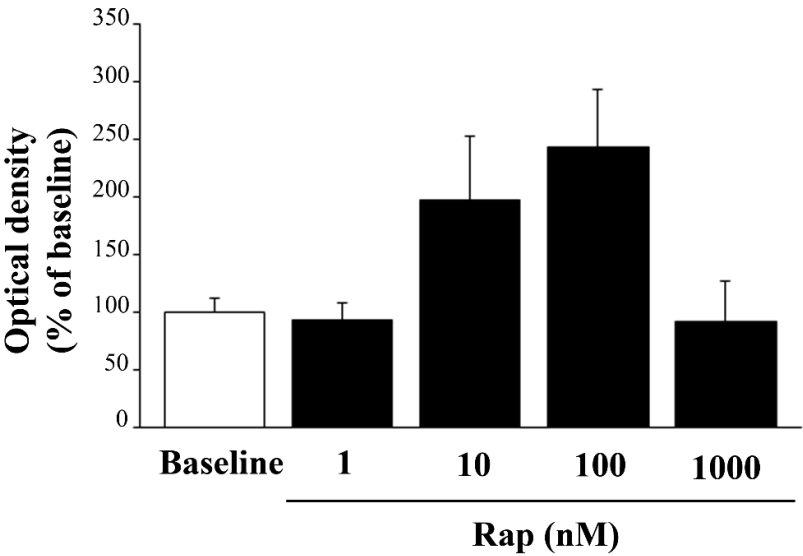

**Figure S6.** Alternative quantification of immuno-blotting for PK-resistant  $\alpha$ -syn with respect to the monomeric  $\alpha$ -syn from PK-untreated samples.

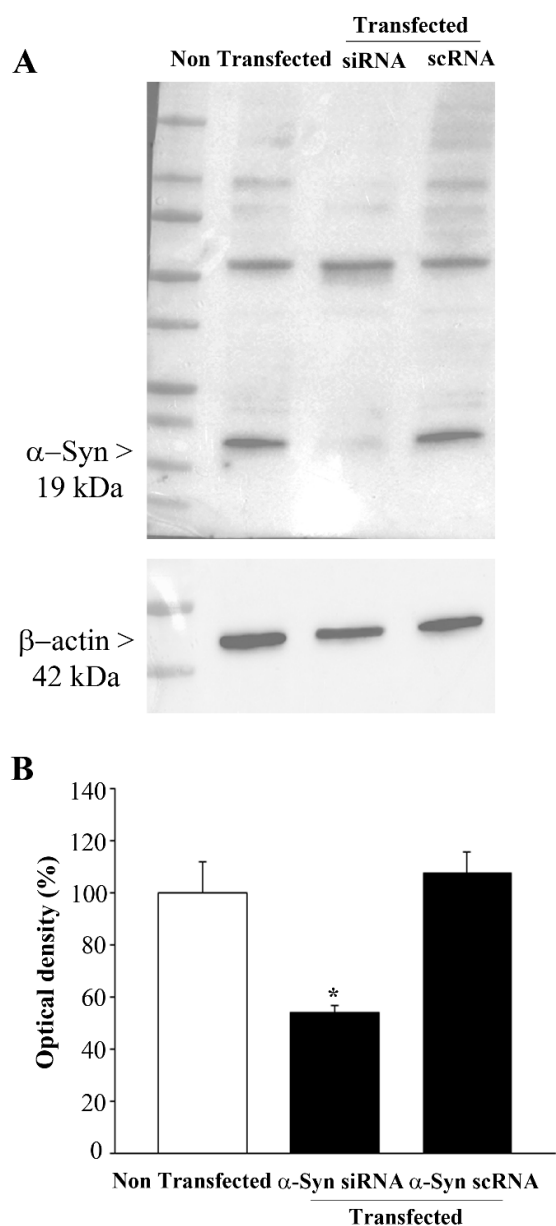

**Figure S7.** Immuno-blotting for  $\alpha$ -syn in U87MG cells transfected with  $\alpha$ -syn siRNA. (A) Immunoblotting for  $\alpha$ -syn in non-transfected,  $\alpha$ -syn siRNA transfected and scRNA transfected cells is shown. (B) The graph reports the optical density as a ratio between the optical density of  $\alpha$ -syn and that of  $\beta$ -actin (non-transfected cells as 100%). Values are given as the mean percentage  $\pm$  S.E.M. of n=3 blots obtained in N = 1 experiment. .

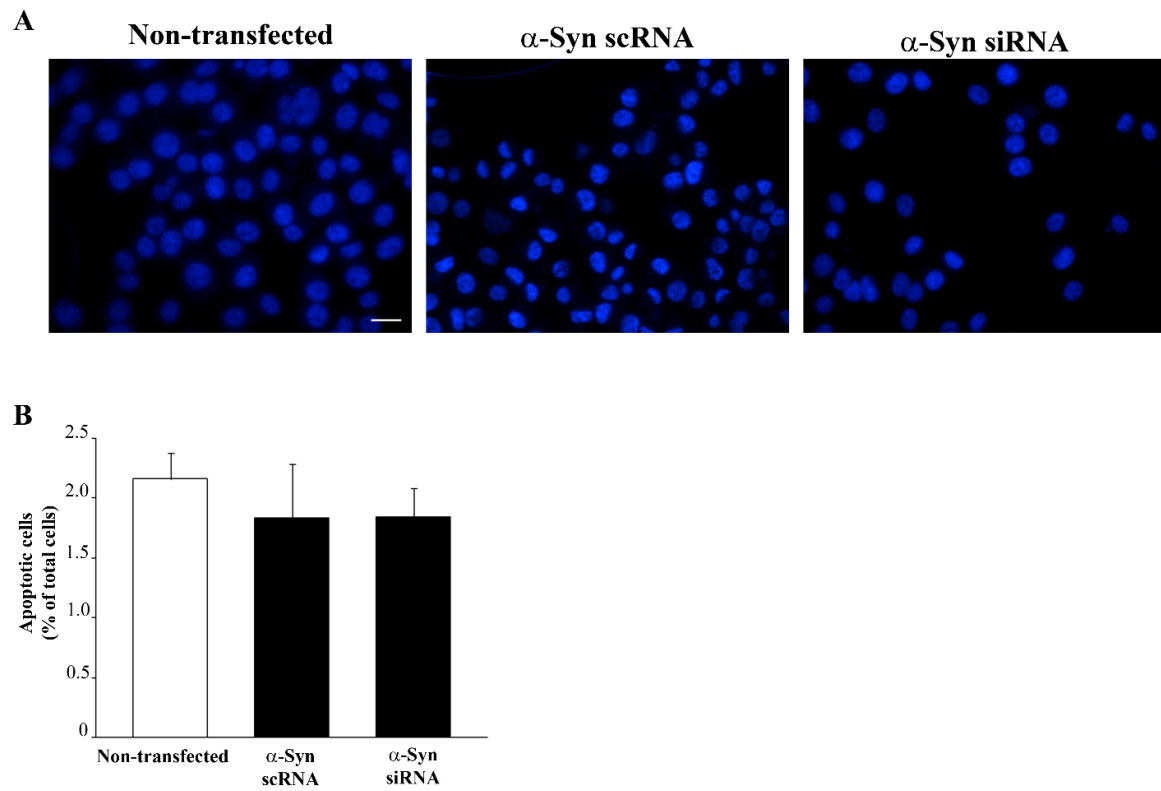

**Figure S8.** Silencing  $\alpha$ -syn in U87MG cells does not induce apoptosis. **(A)** Representative pictures of Hoechst-fluorescent nuclei from non-transfected, scRNA transfected and  $\alpha$ -syn siRNA transfected cells are shown. **(B)** Graph reports the percentage of apoptotic cells counted in each experimental group out of the total number of cells. Scale bar = 25  $\mu$ m.
